# Supplementary material
Source: PubMed Central journal article supplement (PMC3218562)
Supplement: NIHMS318382-supplement-1.pdf [file NIHMS318382-supplement-1.pdf]

Supplemental Table 1. Ovis Aries TaqMan Primer Sequences

| Gene           | Sequence                     | Primer/Probe |
|----------------|------------------------------|--------------|
| MMP-1          | GCCATTCCCTTGGACTTGCTCAAT     | Forward      |
|                | TGGATCCCATCAATGTCGTCCTGA     | Reverse      |
|                | CCCAGTTACACCTTCAGTGGTGATGT   | Probe        |
| MMP-2          | TCCAGAAGGTGGATGCTGCCTTTA     | Forward      |
|                | ATCCAGGTTATCAGGGATGGCGTT     | Reverse      |
|                | ACATCTTCGCTGGAGACAAATTCTGGAG | Probe        |
| MMP-13         | GTTTCCCATCTACACCTACACTGG     | Forward      |
|                | GTAGAGAGACTGAATCCCGGAC       | Reverse      |
|                | AGCCACTTTATGCTTCCTGACGATGAC  | Probe        |
| MT1-MMP        | TCCAGGGACTCAAATGGCAGCATA     | Forward      |
|                | AGATCATGATGTCGGCCTGCTTCT     | Reverse      |
|                | ACATTTGAGGCCATCCGCAAGGCATT   | Probe        |
| TIMP-1         | ACCTATGCTGCTGGTTGTGAGGAA     | Forward      |
|                | GCAATGAGTGTCGCTCTGCAGTTT     | Reverse      |
|                | TGCACAGTGTTTCCCTGCTCATCT     | Probe        |
| TIMP-2         | CATGATCCCATGCTACATCTCCTC     | Forward      |
|                | GATGTCCGTTGATGTTCTTCTCCG     | Reverse      |
|                | ACGAGTGCCTCTGGATGGACTGGGT    | Probe        |
| TIMP-4         | ATGTGGCAGCTTGTGTCTAG         | Forward      |
|                | GTTTAGAGGCAGGGATAAAGGG       | Reverse      |
|                | TGGCCCAACGTGTTCTGGACT        | Probe        |
| COL1A2         | ATACGCGGACTTTGTTGCTGCTTG     | Forward      |
|                | CCCTTCTTGCAAGTTGCCTCTTGT     | Reverse      |
|                | TCACTTCGTGCCTAGCAACATGCCAA   | Probe        |
| COL3A1         | CTGGAAGCCAGAACCATGCCAAAT     | Forward      |
|                | TGGGCAAACCTGCACAACATTCTCC    | Reverse      |
|                | TCAGGATCCGTTCTCTGCGATGACAT   | Probe        |
| SMAD-2         | TGCACTATCACTTAGGCACTCG       | Forward      |
|                | GAGAGGTTCTGCCTAGGTTTACTC     | Reverse      |
|                | AGAAGACATATAGGAAGAGGAGTGCGCT | Probe        |
| TGF- $\beta$ 1 | GACCCACAGAGAGGAAATAGAAGG     | Forward      |
|                | GTTGATGTCCACTTGAAGCGTG       | Reverse      |
|                | AGTGCCCACTGTTCTGTGACAGTAA    | Probe        |

All primers were custom ordered through Integrated DNA Technologies (Coralville, IA).
